# Supplementary material for: Low-Oxygen Responses of Cut Carnation Flowers Associated with Modified Atmosphere Packaging
Source: MDPI journal article supplement (doi:10.3390/plants12142738), 2023-07-23
Supplement: s1 [file s1]

**Table S1.** AP2 and RAV genes identified in Carnation DB.

| <b>Gene Name</b> | <b>ORF ID</b> | <b>Scaffold ID</b> | <b>CDS (bp)</b> | <b>Amino Acid<br/>Residue Number</b> | <b>Information on<br/>Expression</b> |
|------------------|---------------|--------------------|-----------------|--------------------------------------|--------------------------------------|
| <i>DcAP2-1</i>   | Dca57571.1    | scaffold83         | 1782            | 594                                  | EST [47], TSA [48]                   |
| <i>DcAP2-2</i>   | Dca21030.1    | scaffold2131       | 1071            | 357                                  | -                                    |
| <i>DcAP2-3</i>   | Dca22443.1    | scaffold225        | 1662            | 554                                  | TSA [48]                             |
| <i>DcAP2-4</i>   | Dca44633.1    | scaffold515        | 1365            | 455                                  | TSA [48]                             |
| <i>DcAP2-5</i>   | Dca3403.1     | scaffold1120       | 1884            | 628                                  | TSA [48]                             |
| <i>DcAP2-6</i>   | Dca28099.1    | scaffold28         | 1491            | 497                                  | TSA [48]                             |
| <i>DcAP2-7</i>   | Dca24904.1    | scaffold248        | 1716            | 572                                  | -                                    |
| <i>DcAP2-8</i>   | Dca20778.1    | scaffold211        | 1431            | 477                                  | -                                    |
| <i>DcAP2-9</i>   | Dca29759.1    | scaffold297        | 1887            | 629                                  | -                                    |
| <i>DcRAV1</i>    | Dca18854.1    | scaffold1983       | 1086            | 362                                  | EST [47], TSA [48]                   |

**Table S2.** ERF genes identified in Carnation DB.

| Gene Name      | ORF ID     | Scaffold ID   | CDS (bp) | Amino Acid<br>Residue Number | Information on<br>Expression           |
|----------------|------------|---------------|----------|------------------------------|----------------------------------------|
| <i>DcERF1</i>  | Dca51601.1 | scaffold67    | 813      | 271                          | Nucleotide [26],<br>EST [47], TSA [48] |
| <i>DcERF2</i>  | Dca17620.1 | scaffold19    | 963      | 321                          | EST [47]                               |
| <i>DcERF3</i>  | Dca2902.1  | scaffold110   | 894      | 298                          | EST [47], TSA [48]                     |
| <i>DcERF4</i>  | Dca38307.1 | scaffold41    | 864      | 288                          | -                                      |
| <i>DcERF5</i>  | Dca23859.1 | scaffold2381  | 1218     | 406                          | -                                      |
| <i>DcERF6</i>  | Dca62148.1 | scaffold9805  | 552      | 184                          | EST [47]                               |
| <i>DcERF7</i>  | Dca42253.1 | scaffold4737  | 816      | 272                          | -                                      |
| <i>DcERF8</i>  | Dca61162.1 | scaffold9463  | 915      | 305                          | -                                      |
| <i>DcERF9</i>  | Dca21337.1 | scaffold216   | 723      | 241                          | -                                      |
| <i>DcERF10</i> | Dca57583.1 | scaffold830   | 738      | 246                          | EST [47], TSA [48]                     |
| <i>DcERF11</i> | Dca57446.1 | scaffold8257  | 576      | 192                          | -                                      |
| <i>DcERF12</i> | Dca32515.1 | scaffold33    | 585      | 195                          | -                                      |
| <i>DcERF13</i> | Dca39896.1 | scaffold434   | 939      | 313                          | EST [47]                               |
| <i>DcERF14</i> | Dca43835.1 | scaffold50    | 951      | 317                          | TSA [48]                               |
| <i>DcERF15</i> | Dca35739.1 | scaffold373   | 1062     | 354                          | EST [47], TSA [48]                     |
| <i>DcERF16</i> | Dca48192.1 | scaffold592   | 1071     | 357                          | EST [47], TSA [48]                     |
| <i>DcERF17</i> | Dca56998.1 | scaffold813   | 1002     | 334                          | TSA [48]                               |
| <i>DcERF18</i> | Dca57004.1 | scaffold813   | 996      | 332                          | EST [47], TSA [48]                     |
| <i>DcERF19</i> | Dca55626.1 | scaffold777   | 804*     | 268*                         | -                                      |
| <i>DCERF20</i> | Dca10360.1 | scaffold14520 | 645      | 215                          | EST [47]                               |
| <i>DcERF21</i> | Dca39736.1 | scaffold4310  | 612      | 204                          | EST [47], TSA [48]                     |
| <i>DcERF22</i> | Dca21114.1 | scaffold214   | 789      | 263                          | EST [47], TSA [48]                     |
| <i>DcERF23</i> | Dca11198.1 | scaffold15    | 945      | 315                          | EST [47], TSA [48]                     |
| <i>DcERF24</i> | Dca11199.1 | scaffold15    | 801      | 267                          | -                                      |
| <i>DcERF25</i> | Dca52842.1 | scaffold7     | 1557     | 519                          | TSA [48]                               |
| <i>DcERF26</i> | Dca3623.1  | scaffold113   | 1221     | 407                          | EST [47]                               |
| <i>DcERF27</i> | Dca12450.1 | scaffold157   | 978      | 326                          | EST [47], TSA [48]                     |
| <i>DcERF28</i> | Dca17458.1 | scaffold189   | 1005     | 335                          | TSA [48]                               |
| <i>DcERF29</i> | Dca4734.1  | scaffold1179  | 1017     | 339                          | EST [47], TSA [48]                     |
| <i>DcERF30</i> | Dca61124.1 | scaffold945   | 915      | 305                          | -                                      |
| <i>DcERF31</i> | Dca16525.1 | scaffold1819  | 1938     | 646                          | TSA [48]                               |
| <i>DcERF32</i> | Dca49218.1 | scaffold6121  | 1479     | 493                          | -                                      |

\* Data were obtained from the cDNA sequences cloned from ‘West Diamond’ (LC659678) and ‘Ekubo’ (LC659682).

**Table S3.** Primers used for cDNA cloning and real-time RT-PCR.

| Gene                     | Forward Primer (5' to 3')  | Reverse Primer (5' to 3')      |
|--------------------------|----------------------------|--------------------------------|
| cDNA cloning (3' RACE)   |                            |                                |
| <i>DcERF19</i>           | CCCGAAAGCCATTACAACAGC      | GTTTCCAGTCACGAC*               |
| cDNA cloning (whole CDS) |                            |                                |
| <i>DcSUS2</i>            | CAGAAAATGGCAAGTCGTTTGAC    | CGACCAGCGGAGAACACGTA           |
| <i>DcADH1</i>            | TAATGTCGAGTACCGCCGGACAAG   | GATGTCGATTCAAGCGTCC            |
| <i>DcERF19</i>           | CATGTGTGGTGGTGCAATTTTAGCCA | GCAGCTTATCTTTGTTGCAAACA        |
| <i>DcPGB1</i>            | GAGGGAAGCAAATAACATGG       | CCGGAGATGAACAAGCAGAA           |
| Real-time RT-PCR         |                            |                                |
| <i>DcERF15</i>           | GGATGGTCTGACCAATGTGG       | CGAACAGATGACCCTGCGAA           |
| <i>DcERF16</i>           | GCTAGCGAGTTTTCTCAGGA       | GCTCGGAAATCCATTGCCAA           |
| <i>DcERF17</i>           | GAGACGTCGTTCGTGGACGA       | GCGATAACAGATACATGTCTGTAGAC     |
| <i>DcERF18</i>           | GAGACGCCATTCGTGGACAA       | ACGATAACAGATACACGTCCATC        |
| <i>DcERF19</i>           | GCTGCGTAAAACTGTTAGG        | GCAGCTTATCTTTGTTGCAAACA        |
| <i>DcSUS2</i>            | GGCTGCTAACTCTTGCGGGT       | CGACCAGCGGAGAACACGTA           |
| <i>DcADH1</i>            | CAAGCCTAGAACCGACATAC       | GATGTCGATTCAAGCGTCC            |
| <i>DcPGB1</i>            | CTGCGATTCAACTGCGAGAG       | GCAGTGCTTCTTTCACAACC           |
| <i>DcUbq3-7</i>          | GTTGTTGGTTTCAGGGCTGGTTTG   | CTACGGTAATTGAGAATTCACACCGAAATG |

\* M13PrimerM4

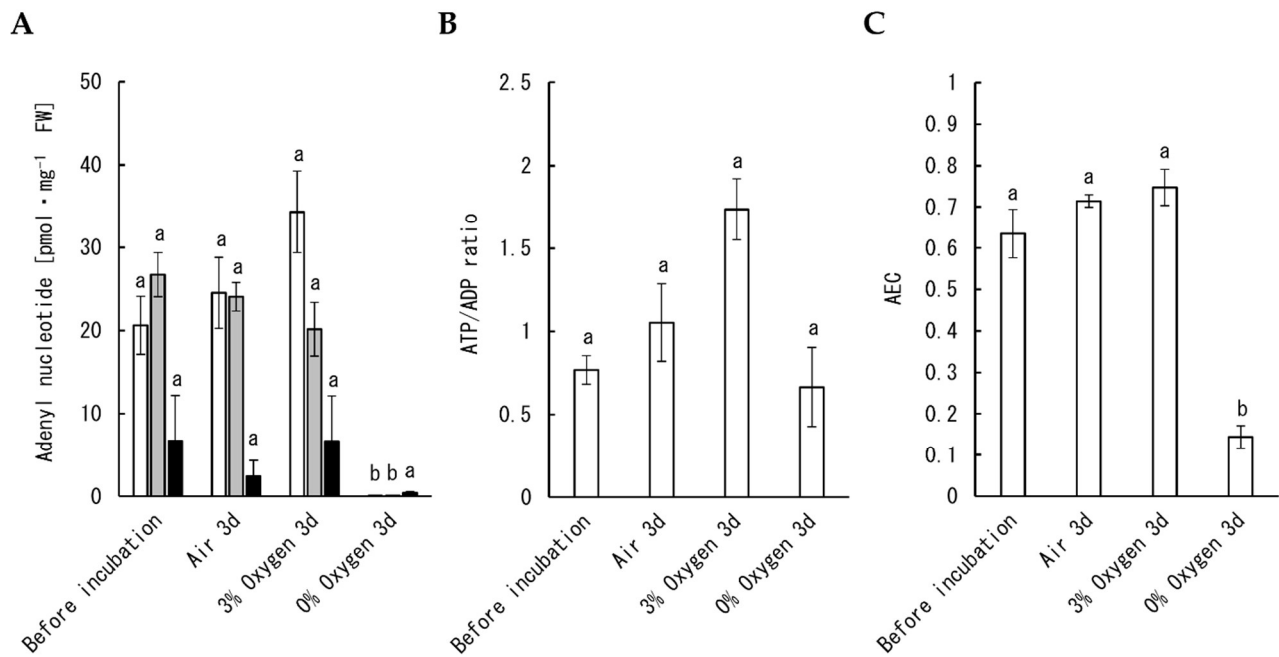

**Figure S1.** Effects of hypoxia and anoxia on adenyly nucleotide contents, ATP/ADP ratio, and AEC in carnation petals. Contents of ATP (white bars), ADP (gray bars), and AMP (black bars) in petals before and after incubation in air, and under hypoxia (3% oxygen) and anoxia (0% oxygen) for three days were determined using a luminometric method (**A**), and used for calculation of ATP/ADP ratio (**B**) and AEC (**C**). Data are expressed as the mean  $\pm$  SE of three separate samples. Significant differences ( $p < 0.05$ ) detected using Tukey's multiple comparison test are indicated by different letters above the bars.

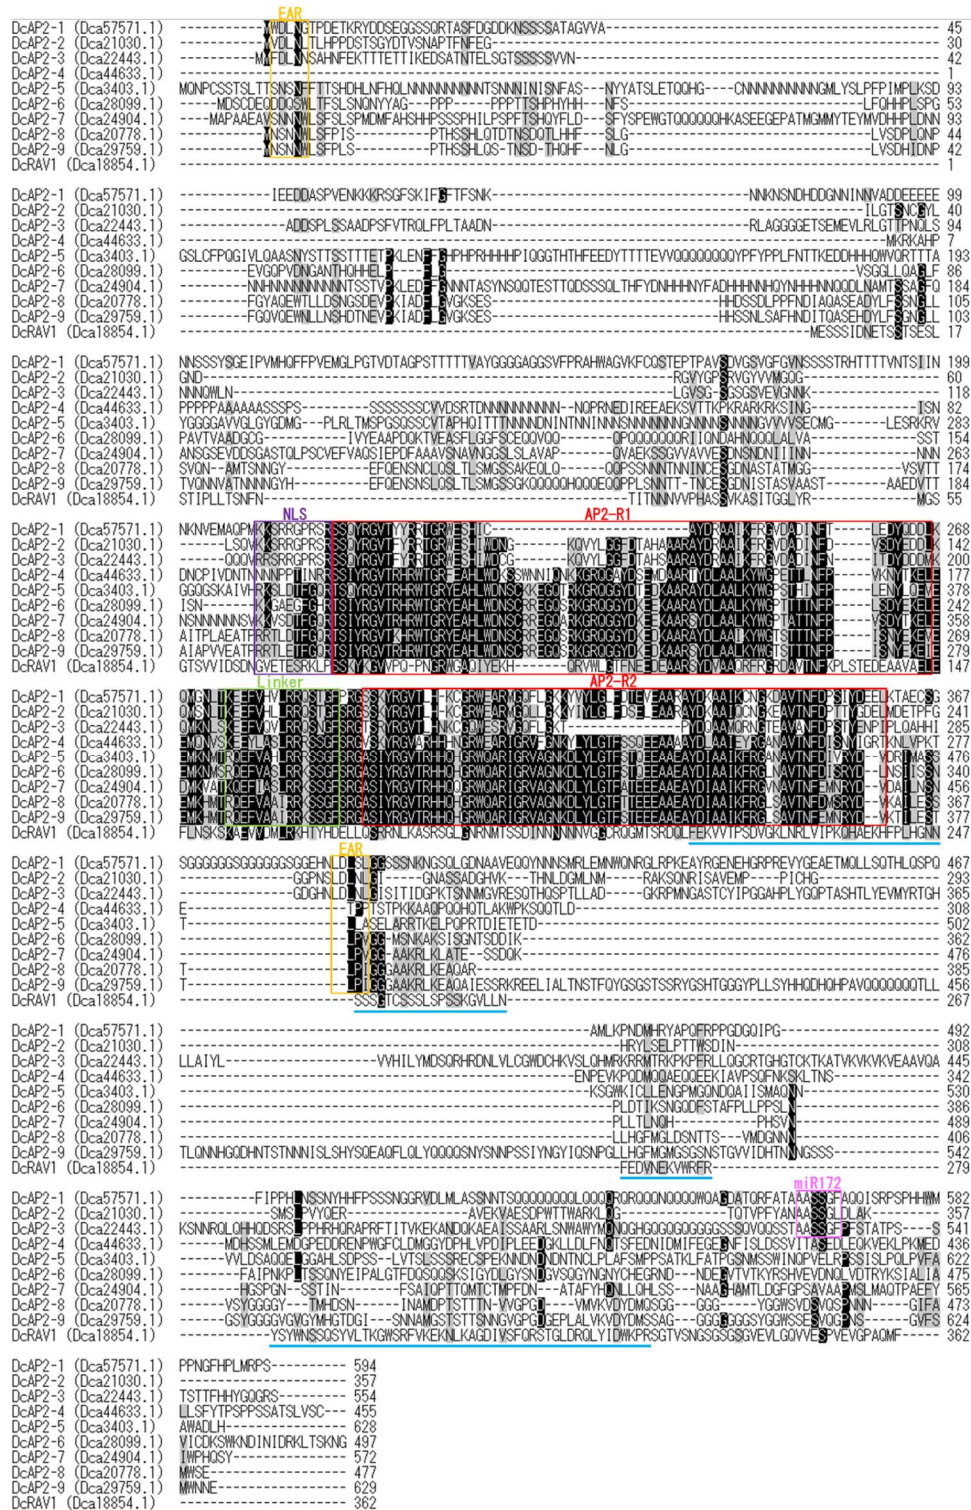

**Figure S2.** Multiple alignment of deduced amino acid sequences of AP2 and RAV from carnation. The sequences were aligned using ClustalW and BioEdit software. Identical or similar amino acids are indicated by a black or gray background, respectively, and gaps are indicated by dashes. The two AP2 (or ANT) domains, the EAR motif-like sequences, a putative nuclear localization signal (NLS) motif, a liker domain and the sequence derived from the target site for miR172 binding described in previous studies [33,34] are indicated by color-coded boxes. The B3-like domain conserved in RAV is indicated by blue underlines.



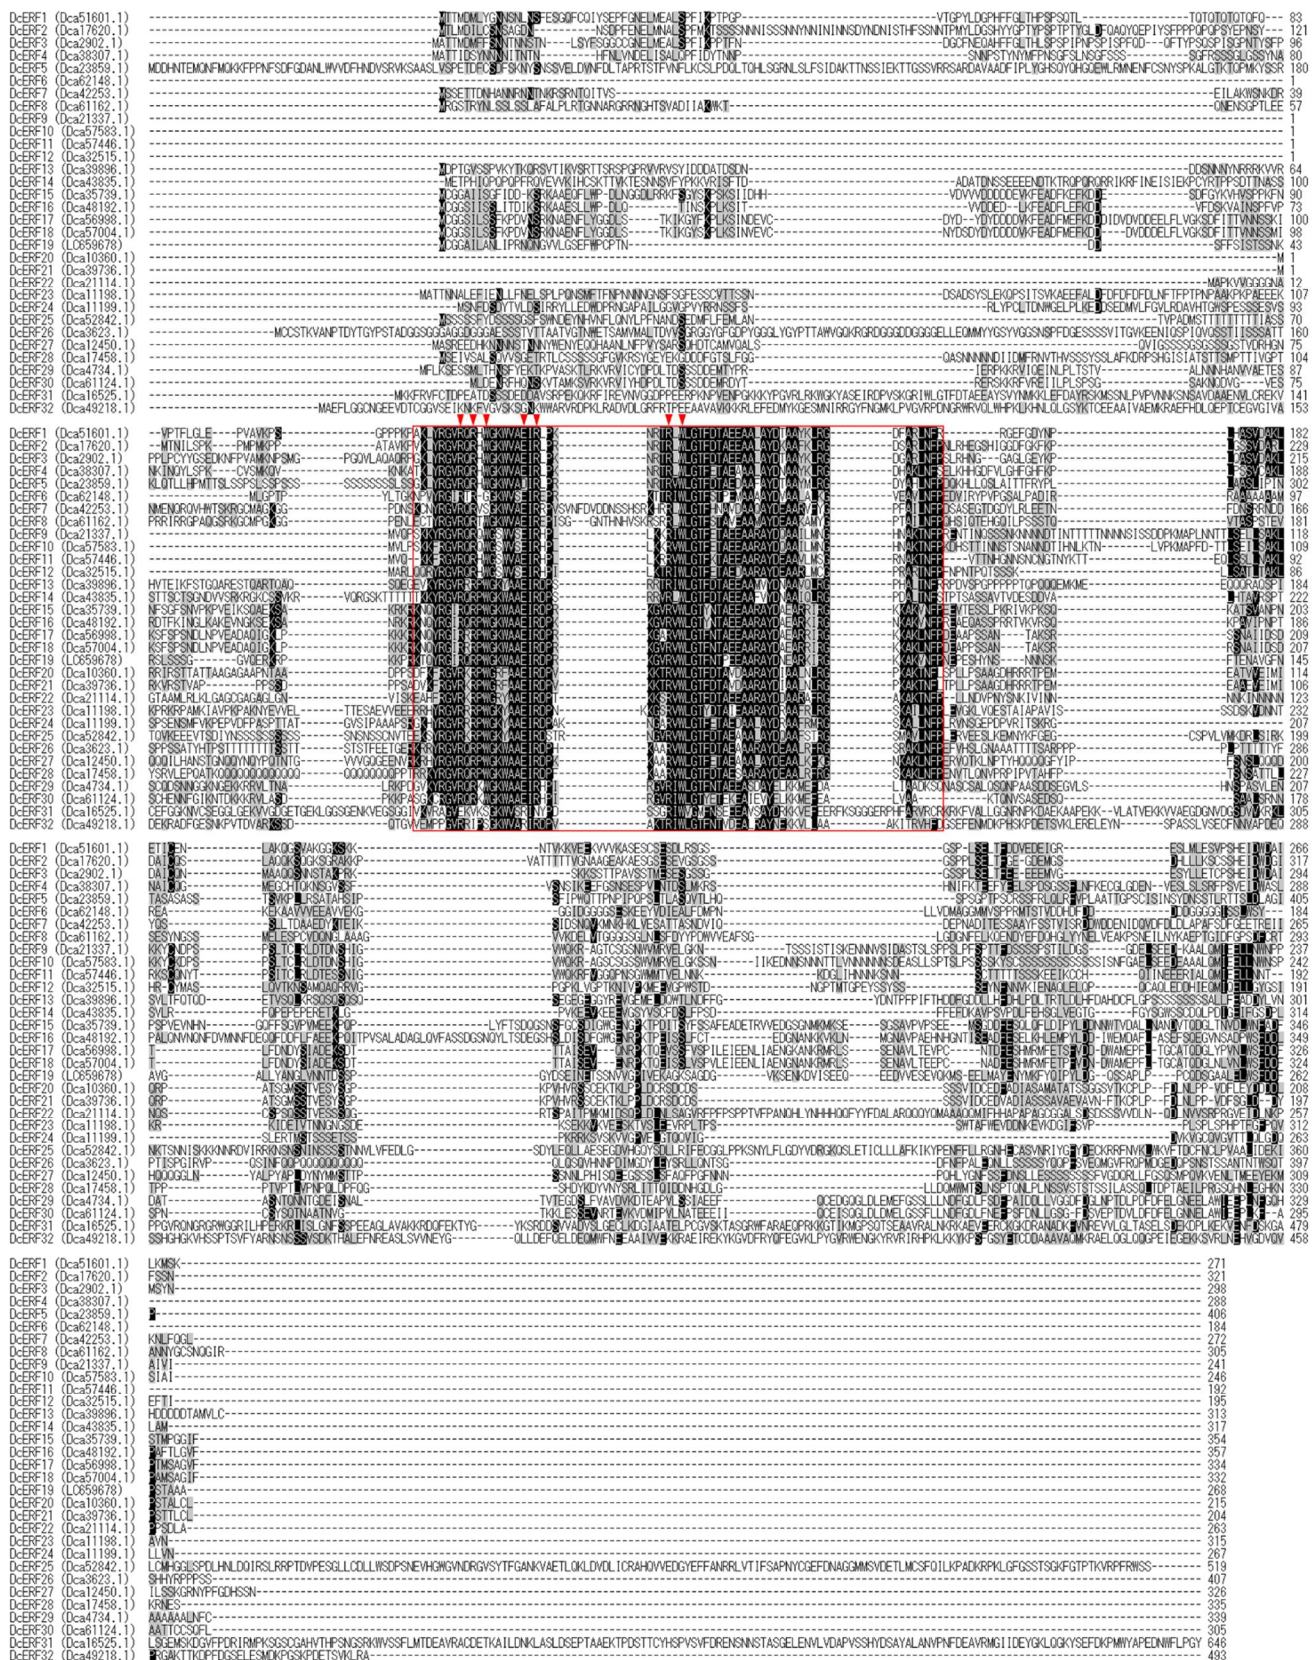

**Figure S3.** Multiple alignment of deduced amino acid sequences of ERF from carnation. The sequences were aligned using ClustalW and BioEdit software. Identical or similar amino acids are indicated by a black or gray background, respectively, and gaps are indicated by dashes. AP2/ERF domain and amino acid residues directly contact with DNA [18] are indicated by a box and arrowheads, respectively.

```

PGB1 (At2g16060) MESEGKIVFTEEQEALVWKSWSVMKKNSAELGKLFIKLFEIAPITTKMFSLRDSPIPA 60
DcPGB1 (Dca3435.1) -----MVETEKEESLVKESWEILKLNIPENSLRFITILLIETAPAAKDLFSFLRDSQVPS 54

PGB1 (At2g16060) EQNPKLPHAMSVFVMCDESANQLRKTGKVTIETITLKR LGASHSKYGVVDEHFEVAKYA 120
DcPGB1 (Dca3435.1) QNNPKLKAHAMKVFKITDESATQLRECEMVVGDSTLKY LGAIHSNSGVVGPVFEVWKEA 114

PGB1 (At2g16060) LETIKAEVPEMWSPKVMVWGQAYDHLVAATKAEMLSN- 160
DcPGB1 (Dca3435.1) LLKTIQEAVGDKWNQQMSCAWAAAYDQAAATKSEMNHPTS 155

```

**Figure S4.** Multiple alignment of deduced amino acid sequences of PGB from *Arabidopsis* and carnation. The sequences were aligned using ClustalW and BioEdit software. Identical or similar amino acids are indicated by a black or gray background, respectively, and gaps are indicated by dashes. The conserved amino acid residues involved in heme and ligand binding are indicated by arrowheads.

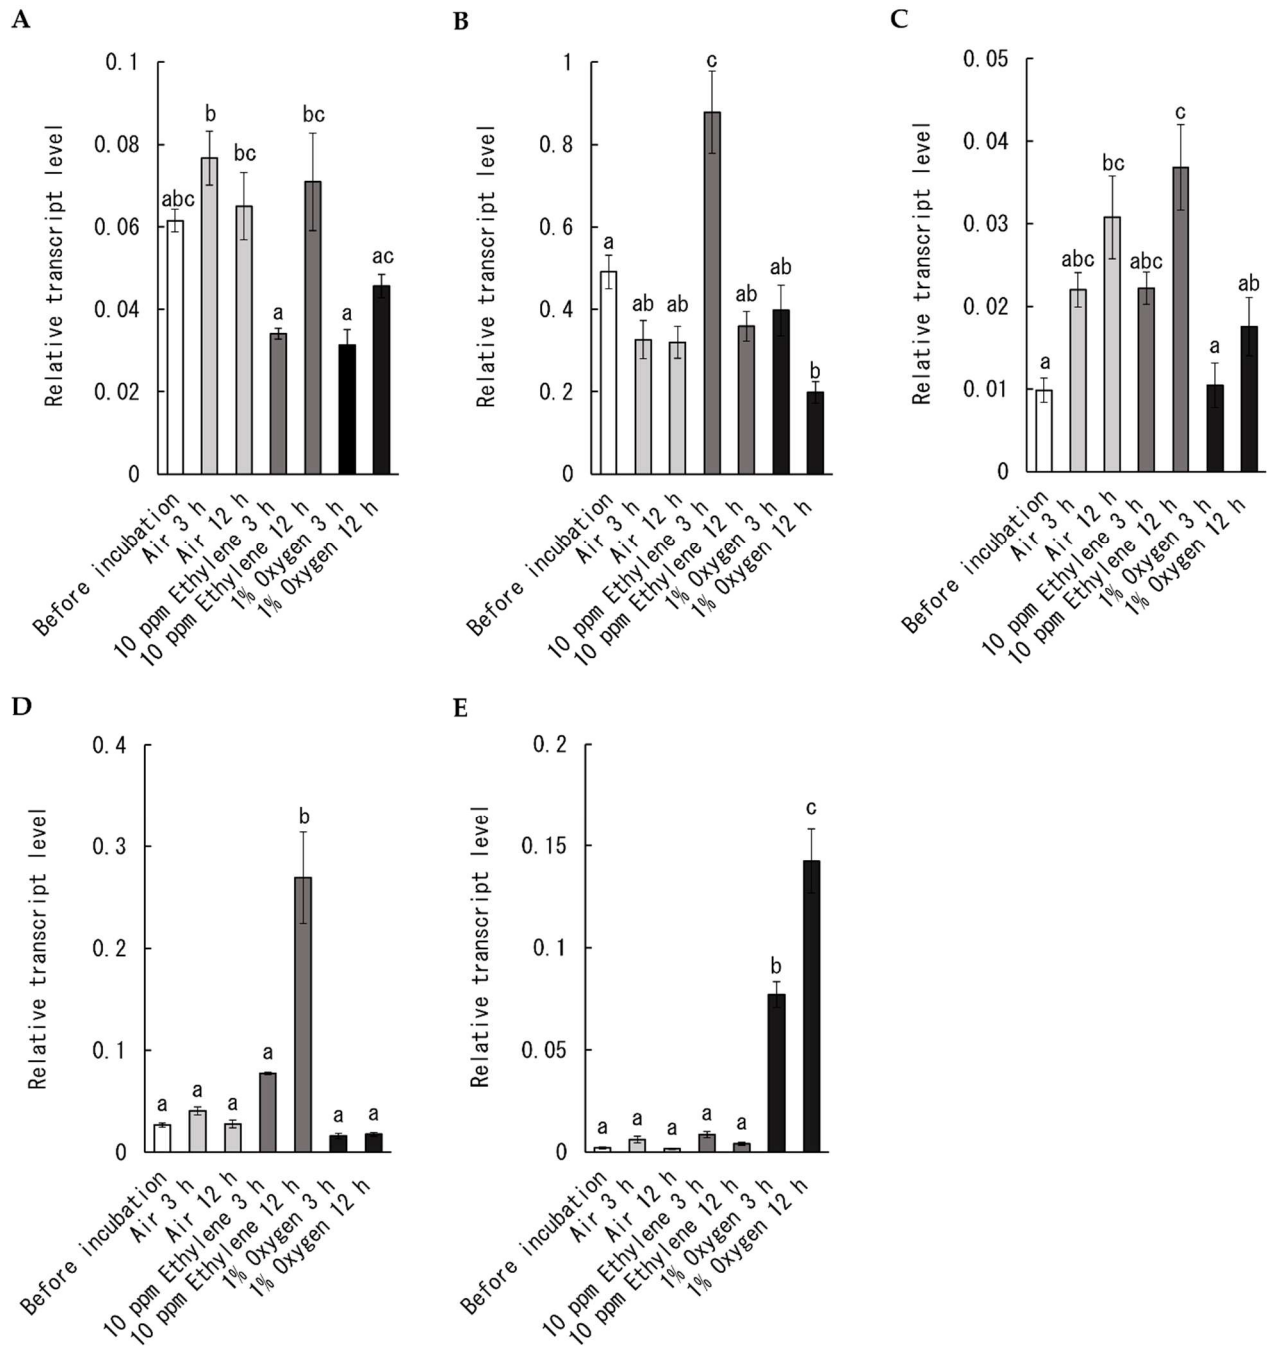

**Figure S5.** Effects of ethylene and hypoxia on transcript levels of group VII ERF genes in carnation ('West Diamond') petals. Relative transcript levels of *DcERF15* (A), *DcERF16* (B), *DcERF17* (C), *DcERF18* (D), and *DcERF19* (E) in petals before and after incubation in air, and under 10 ppm ethylene and hypoxia (1% oxygen) for 3 and 12 h were determined using real-time RT-PCR with *DcUbg3-7* as a standard. Data are expressed as the mean  $\pm$  SE of three separate samples. Significant differences ( $p < 0.05$ ) detected using Tukey's multiple comparison test are indicated by different letters above the bars.



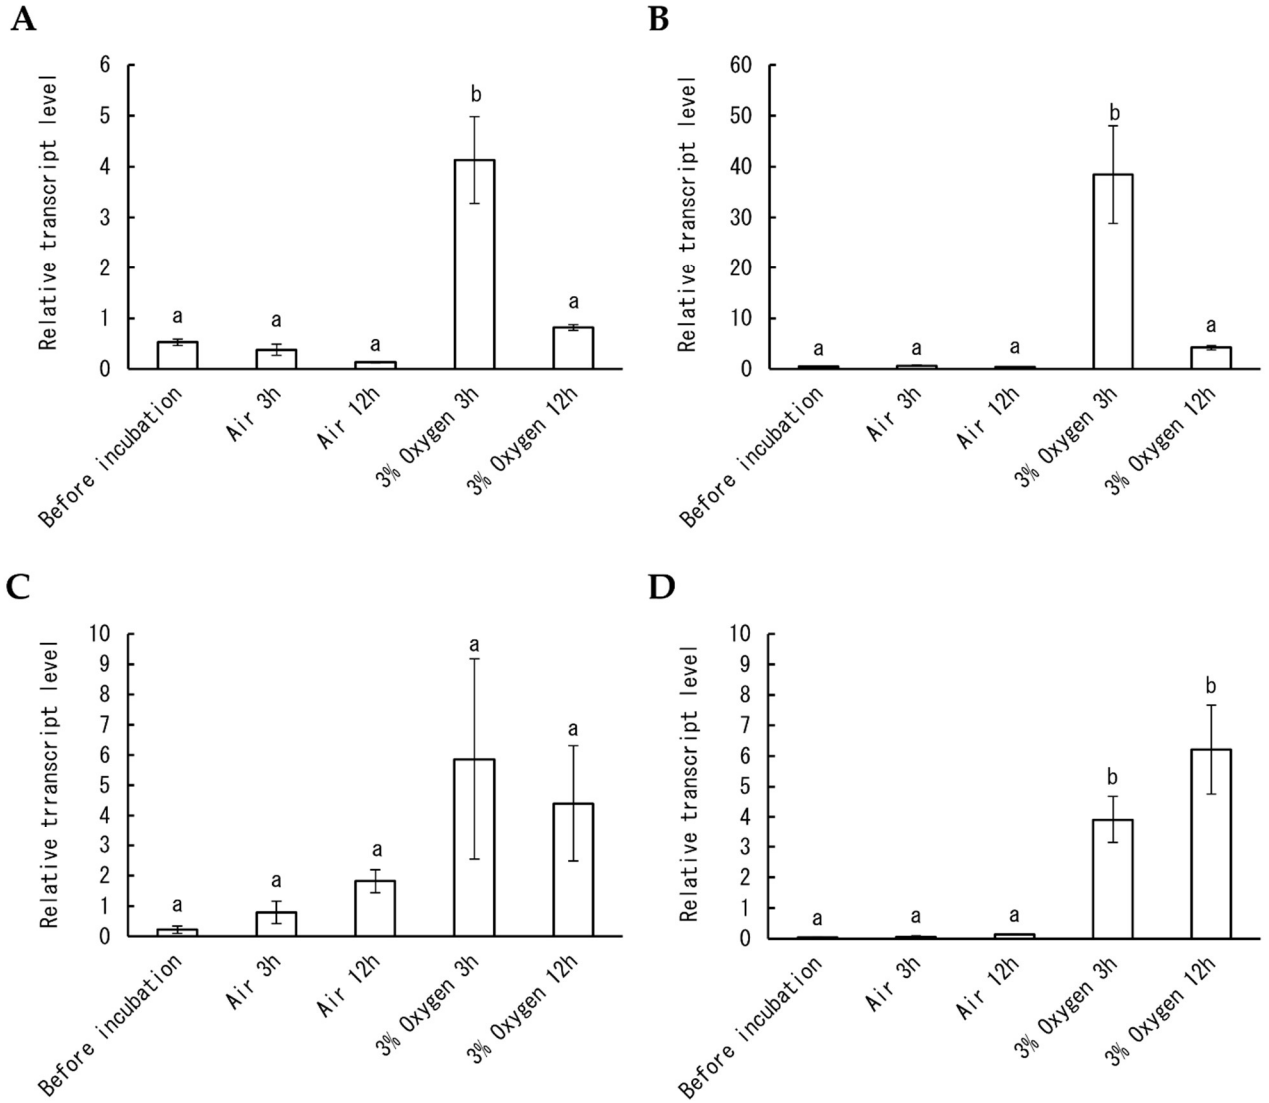

**Figure S6.** Effects of hypoxia on transcript levels of hypoxia-related genes in carnation petals. Relative transcript levels of *DcSUS2* (A), *DcADH1* (B), *DcERF19* (C), and *DcPGB1* (D) in petals before and after incubation in air, and under hypoxia (3% oxygen) for 3 and 12 h were determined using real-time RT-PCR with *DcUbq3-7* as a standard. Data are expressed as the mean  $\pm$  SE of three separate samples. Significant differences ( $p < 0.05$ ) detected using Tukey's multiple comparison test are indicated by different letters above the bars.
