# Supplementary material
Source: MDPI journal article supplement (https://www.mdpi.com/2223-7747/12/14/2738)
Supplement: s1 [file s1]

Archive with 1 entries (1 files):
- plants-12-02738-s001.pdf
